# Supplementary material for: Partial Hepatic Vein Occlusion and Venous Congestion in Liver Exploration Using a Hyperspectral Camera: A Proposal for Monitoring Intraoperative Liver Perfusion
Source: MDPI journal article supplement (doi:10.3390/cancers15082397), 2023-04-21
Supplement: s1 [file s1]

## SUPPLEMENTARY MATERIALS

**Supplementary Figure S1.** 3-dimensional plot of the absorbance variation among the spectra between liver lobes. A) t0, B) t1, C) t2, D) t3, E) t4.

A.

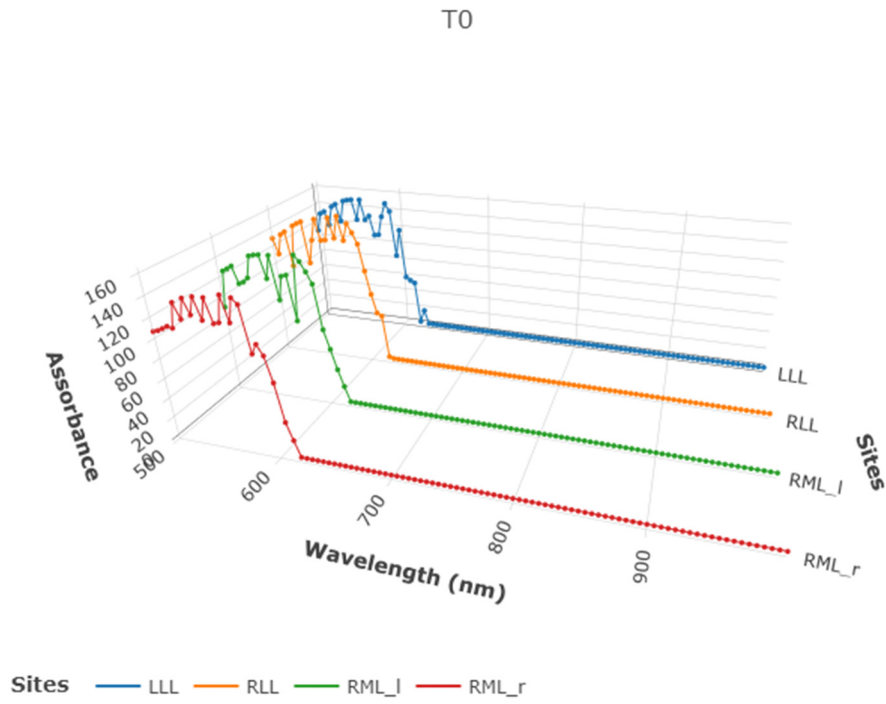

B.

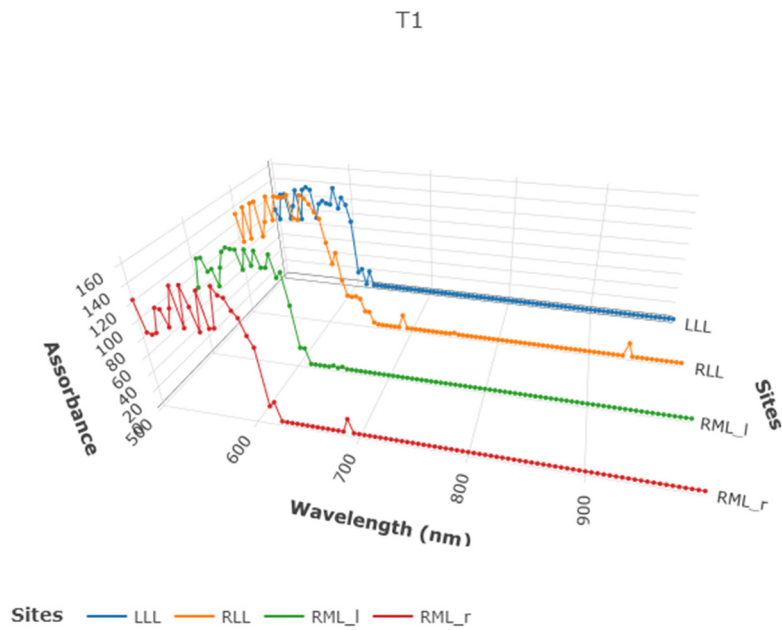

C.

T2

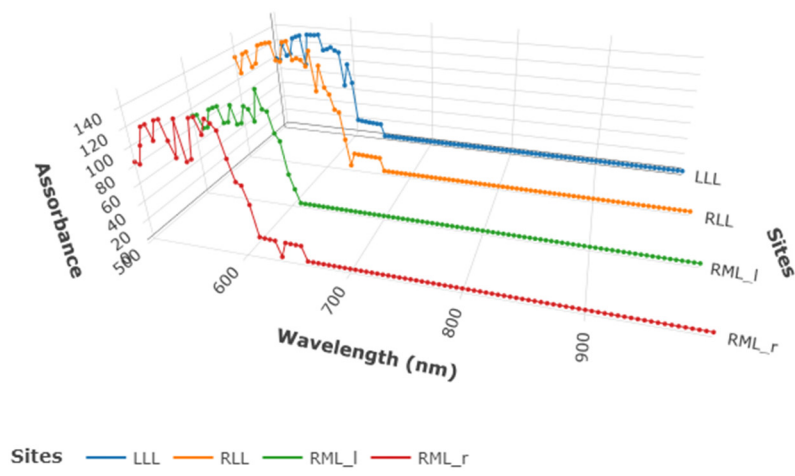

D.

T3

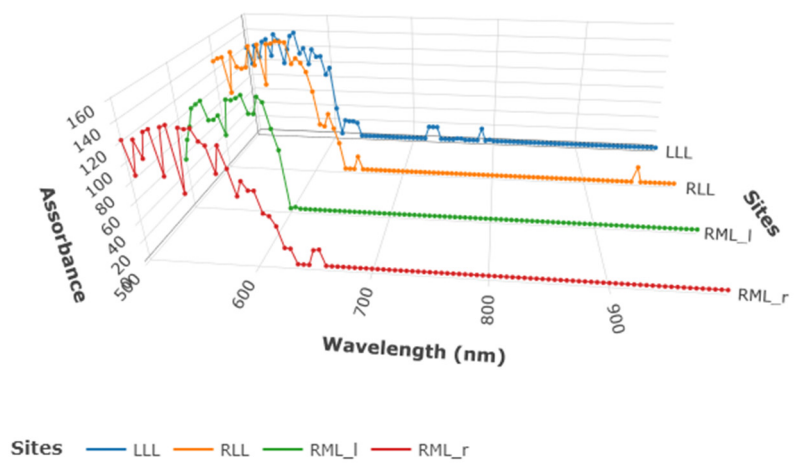

E.

T4

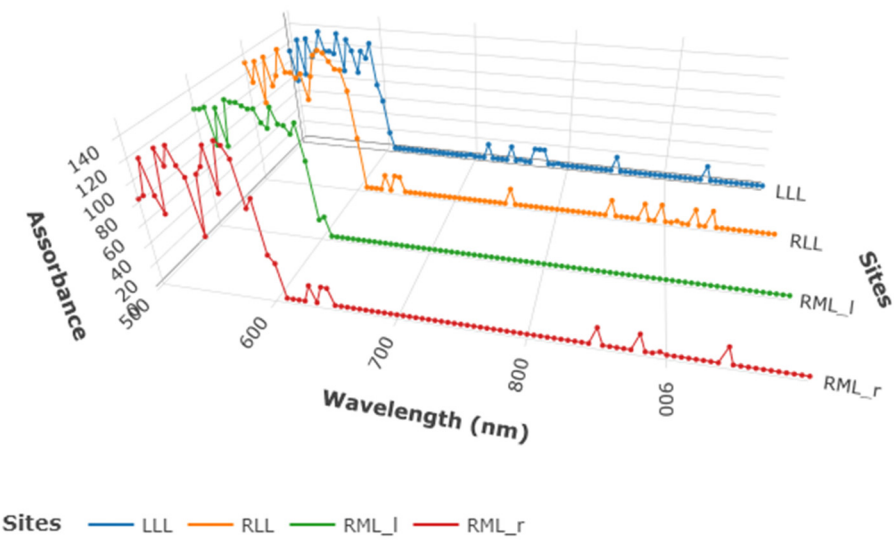

**Supplementary Table S1.** Random effects report of the mixed-effects linear regression to estimate the variations of the hyperspectral indexes among different liver lobes. In this table, the reference level is the left lateral lobe.

| T | index |    | Parameter       | Coefficient |
|---|-------|----|-----------------|-------------|
| 0 | StO2% | SD | (Intercept: ID) | 16.87       |
|   |       | SD | (Residual)      | 7.17        |
|   | NIR   | SD | (Intercept: ID) | 7.05        |
|   |       | SD | (Residual)      | 10.4        |
|   | THI   | SD | (Intercept: ID) | 9.31        |
|   |       | SD | (Residual)      | 7.99        |
|   | DeHb  | SD | (Intercept: ID) | 14.15       |
|   |       | SD | (Residual)      | 7.76        |
|   | StO2% | SD | (Intercept: ID) | 4.02        |
|   |       | SD | (Residual)      | 7.11        |
| 1 | NIR   | SD | (Intercept: ID) | 1.33        |
|   |       | SD | (Residual)      | 14.02       |
|   | THI   | SD | (Intercept: ID) | 11.49       |
|   |       | SD | (Residual)      | 4.71        |
|   | DeHb  | SD | (Intercept: ID) | 8.6         |
|   |       | SD | (Residual)      | 4.95        |
|   | StO2% | SD | (Intercept: ID) | 14.01       |
|   |       | SD | (Residual)      | 9.91        |
|   | NIR   | SD | (Intercept: ID) | 20.87       |
|   |       | SD | (Residual)      | 12.97       |
| 2 | THI   | SD | (Intercept: ID) | 9.21        |
|   |       | SD | (Residual)      | 7.66        |
|   | DeHb  | SD | (Intercept: ID) | 11.58       |
|   |       | SD | (Residual)      | 4.46        |
|   | StO2% | SD | (Intercept: ID) | 11.91       |
|   |       | SD | (Residual)      | 8.45        |
|   | NIR   | SD | (Intercept: ID) | 7.83        |
|   |       | SD | (Residual)      | 14.22       |
|   | THI   | SD | (Intercept: ID) | 10.07       |
|   |       | SD | (Residual)      | 6.11        |
| 3 | DeHb  | SD | (Intercept: ID) | 12.16       |
|   |       | SD | (Residual)      | 8.21        |
|   | StO2% | SD | (Intercept: ID) | 13.98       |
|   |       | SD | (Residual)      | 7.55        |
|   | NIR   | SD | (Intercept: ID) | 7.83        |
|   |       | SD | (Residual)      | 4.16        |
|   | THI   | SD | (Intercept: ID) | 9.45        |
|   |       | SD | (Residual)      | 6.32        |
|   | DeHb  | SD | (Intercept: ID) | 12.43       |
|   |       | SD | (Residual)      | 6.25        |

**Supplementary Table S2.** Random effects report of the mixed-effects linear regression to estimate the variations of the hyperspectral indexes among different liver lobes. In this table, the reference level is the right lateral lobe, after the exclusion of the left lateral lobe.

| T | index | Parameter          | Coefficient |
|---|-------|--------------------|-------------|
| 0 | StO2% | SD (Intercept: ID) | 17.87       |
|   |       | SD (Residual)      | 7.17        |
|   | NIR   | SD (Intercept: ID) | 7.59        |
|   |       | SD (Residual)      | 12.03       |
|   | THI   | SD (Intercept: ID) | 9.44        |
|   |       | SD (Residual)      | 9.54        |
|   | DeHb  | SD (Intercept: ID) | 14.87       |
|   |       | SD (Residual)      | 8.6         |
|   | StO2% | SD (Intercept: ID) | 3.47        |
|   |       | SD (Residual)      | 4.29        |
|   | NIR   | SD (Intercept: ID) | 8.25        |
|   |       | SD (Residual)      | 13.13       |
| 1 | THI   | SD (Intercept: ID) | 11.57       |
|   |       | SD (Residual)      | 3.74        |
|   | DeHb  | SD (Intercept: ID) | 7.25        |
|   |       | SD (Residual)      | 4.86        |
|   | StO2% | SD (Intercept: ID) | 10.79       |
|   |       | SD (Residual)      | 8.91        |
|   | NIR   | SD (Intercept: ID) | 20.31       |
|   |       | SD (Residual)      | 14.55       |
|   | THI   | SD (Intercept: ID) | 8.58        |
|   |       | SD (Residual)      | 7.8         |
|   | DeHb  | SD (Intercept: ID) | 10.4        |
|   |       | SD (Residual)      | 4.23        |
| 2 | StO2% | SD (Intercept: ID) | 10.28       |
|   |       | SD (Residual)      | 9.34        |
|   | NIR   | SD (Intercept: ID) | 11.09       |
|   |       | SD (Residual)      | 13.99       |
|   | THI   | SD (Intercept: ID) | 9.23        |
|   |       | SD (Residual)      | 6.75        |
|   | DeHb  | SD (Intercept: ID) | 10.94       |
|   |       | SD (Residual)      | 7.21        |
|   | StO2% | SD (Intercept: ID) | 11.83       |
|   |       | SD (Residual)      | 7.76        |
|   | NIR   | SD (Intercept: ID) | 7.59        |
|   |       | SD (Residual)      | 4.46        |
| 4 | THI   | SD (Intercept: ID) | 8.51        |
|   |       | SD (Residual)      | 6.87        |
|   | DeHb  | SD (Intercept: ID) | 11          |
|   |       | SD (Residual)      | 6.12        |

**Supplementary Table S3.** Mixed-effects linear regression to estimate the variations of the hyperspectral indexes among different liver lobes. In this table, the reference level is the right medial lobe – left side, after the exclusion of the left lateral lobe. Above, the random effects were reported.

| T | INDEX | SITE        | Coefficient | SE   | 95% CI           | t      | df | p              |
|---|-------|-------------|-------------|------|------------------|--------|----|----------------|
| 0 | StO2% | (Intercept) | 42.83       | 7.86 | [ 25.85, 59.81]  | 5.45   | 13 | < 0.001        |
|   |       | RLL         | -4          | 4.14 | [-12.95, 4.95]   | -0.97  | 13 | 0.352          |
|   |       | RMLr        | -3          | 4.14 | [-11.95, 5.95]   | -0.72  | 13 | 0.482          |
|   | NIR   | (Intercept) | 59.83       | 5.81 | [ 47.29, 72.38]  | 10.3   | 13 | < 0.001        |
|   |       | RLL         | 0.33        | 6.95 | [-14.68, 15.34]  | 0.05   | 13 | 0.962          |
|   |       | RMLr        | 0.17        | 6.95 | [-14.84, 15.18]  | 0.02   | 13 | 0.981          |
|   | THI   | (Intercept) | 67.5        | 5.48 | [ 55.66, 79.34]  | 12.32  | 13 | < 0.001        |
|   |       | RLL         | 3.67        | 5.51 | [ -8.23, 15.56]  | 0.67   | 13 | 0.517          |
|   |       | RMLr        | -0.83       | 5.51 | [-12.73, 11.06]  | -0.15  | 13 | 0.882          |
|   | DeHb  | (Intercept) | 40.02       | 7.01 | [ 24.87, 55.18]  | 5.71   | 13 | < 0.001        |
|   |       | RLL         | 3.92        | 4.97 | [ -6.81, 14.65]  | 0.79   | 13 | 0.444          |
|   |       | RMLr        | 2.38        | 4.97 | [ -8.35, 13.11]  | 0.48   | 13 | 0.64           |
| 1 | StO2% | (Intercept) | 50.4        | 2.47 | [ 44.90, 55.90]  | 20.42  | 10 | < 0.001        |
|   |       | RLL         | -31         | 2.71 | [-37.05, -24.95] | -11.42 | 10 | < <b>0.001</b> |
|   |       | RMLr        | -24         | 2.71 | [-30.05, -17.95] | -8.84  | 10 | < <b>0.001</b> |
|   | NIR   | (Intercept) | 51          | 6.94 | [ 35.55, 66.45]  | 7.35   | 10 | < 0.001        |
|   |       | RLL         | -22.4       | 8.3  | [-40.90, -3.90]  | -2.7   | 10 | <b>0.022</b>   |
|   |       | RMLr        | -12.2       | 8.3  | [-30.70, 6.30]   | -1.47  | 10 | 0.173          |
|   | THI   | (Intercept) | 56.8        | 5.44 | [ 44.69, 68.91]  | 10.45  | 10 | < 0.001        |
|   |       | RLL         | 11.8        | 2.36 | [ 6.53, 17.07]   | 4.99   | 10 | < <b>0.001</b> |
|   |       | RMLr        | 2.4         | 2.36 | [ -2.87, 7.67]   | 1.02   | 10 | 0.334          |
|   | DeHb  | (Intercept) | 28.1        | 3.9  | [ 19.40, 36.79]  | 7.2    | 10 | < 0.001        |
|   |       | RLL         | 27.09       | 3.07 | [ 20.24, 33.94]  | 8.81   | 10 | < <b>0.001</b> |
|   |       | RMLr        | 15.44       | 3.07 | [ 8.59, 22.29]   | 5.02   | 10 | < <b>0.001</b> |
| 2 | StO2% | (Intercept) | 47.67       | 5.71 | [ 35.32, 60.01]  | 8.34   | 13 | < 0.001        |
|   |       | RLL         | -27.33      | 5.14 | [-38.44, -16.22] | -5.32  | 13 | < <b>0.001</b> |
|   |       | RMLr        | -18.5       | 5.14 | [-29.61, -7.39]  | -3.6   | 13 | <b>0.003</b>   |
|   | NIR   | (Intercept) | 42.67       | 10.2 | [ 20.63, 64.71]  | 4.18   | 13 | 0.001          |
|   |       | RLL         | -10.5       | 8.4  | [-28.65, 7.65]   | -1.25  | 13 | 0.233          |
|   |       | RMLr        | -1.67       | 8.4  | [-19.82, 16.48]  | -0.2   | 13 | 0.846          |
|   | THI   | (Intercept) | 50          | 4.73 | [ 39.77, 60.23]  | 10.56  | 13 | < 0.001        |
|   |       | RLL         | 13.5        | 4.5  | [ 3.78, 23.22]   | 3      | 13 | <b>0.01</b>    |
|   |       | RMLr        | 2.83        | 4.5  | [ -6.89, 12.56]  | 0.63   | 13 | 0.54           |
|   | DeHb  | (Intercept) | 26.43       | 4.58 | [ 16.53, 36.33]  | 5.77   | 13 | < 0.001        |
|   |       | RLL         | 24.44       | 2.44 | [ 19.16, 29.71]  | 10.01  | 13 | < <b>0.001</b> |
|   |       | RMLr        | 10.64       | 2.44 | [ 5.37, 15.92]   | 4.36   | 13 | < <b>0.001</b> |
| 3 | StO2% | (Intercept) | 59          | 6.21 | [ 45.16, 72.84]  | 9.5    | 10 | < 0.001        |
|   |       | RLL         | -34.4       | 5.91 | [-47.56, -21.24] | -5.82  | 10 | < <b>0.001</b> |
|   |       | RMLr        | -25.4       | 5.91 | [-38.56, -12.24] | -4.3   | 10 | <b>0.002</b>   |
|   | NIR   | (Intercept) | 51.8        | 7.98 | [ 34.01, 69.59]  | 6.49   | 10 | < 0.001        |
|   |       | RLL         | -14.4       | 8.85 | [-34.11, 5.31]   | -1.63  | 10 | 0.135          |
|   |       | RMLr        | -2.8        | 8.85 | [-22.51, 16.91]  | -0.32  | 10 | 0.758          |
|   | THI   | (Intercept) | 50.4        | 5.11 | [ 39.01, 61.79]  | 9.86   | 10 | < 0.001        |

|   |       |             |       |      |                  |       |    |                   |
|---|-------|-------------|-------|------|------------------|-------|----|-------------------|
| 4 |       | RLL         | 13.2  | 4.27 | [ 3.69, 22.71]   | 3.09  | 10 | <b>0.011</b>      |
|   |       | RMLr        | 6.4   | 4.27 | [ -3.11, 15.91]  | 1.5   | 10 | 0.165             |
|   |       | (Intercept) | 21.01 | 5.86 | [ 7.95, 34.07]   | 3.58  | 10 | 0.005             |
|   | DeHb  | RLL         | 27.72 | 4.56 | [ 17.55, 37.88]  | 6.08  | 10 | <b>&lt; 0.001</b> |
|   |       | RMLr        | 17.1  | 4.56 | [ 6.94, 27.26]   | 3.75  | 10 | <b>0.004</b>      |
|   |       | (Intercept) | 55.5  | 7.07 | [ 38.77, 72.23]  | 7.84  | 7  | < 0.001           |
|   | StO2% | RLL         | -7.5  | 5.49 | [ -20.48, 5.48]  | -1.37 | 7  | 0.214             |
|   |       | RMLr        | -2    | 5.49 | [ -14.98, 10.98] | -0.36 | 7  | 0.726             |
|   |       | (Intercept) | 61    | 4.4  | [ 50.60, 71.40]  | 13.86 | 7  | < 0.001           |
|   | NIR   | RLL         | -2    | 3.15 | [ -9.46, 5.46]   | -0.63 | 7  | 0.546             |
|   |       | RMLr        | 3.5   | 3.15 | [ -3.96, 10.96]  | 1.11  | 7  | 0.304             |
|   |       | (Intercept) | 52.75 | 5.47 | [ 39.82, 65.68]  | 9.65  | 7  | < 0.001           |
|   | THI   | RLL         | 10    | 4.86 | [ -1.49, 21.49]  | 2.06  | 7  | 0.079             |
|   |       | RMLr        | 9     | 4.86 | [ -2.49, 20.49]  | 1.85  | 7  | 0.106             |
|   |       | (Intercept) | 24.37 | 6.29 | [ 9.49, 39.25]   | 3.87  | 7  | 0.006             |
|   | DeHb  | RLL         | 9.3   | 4.33 | [ -0.93, 19.53]  | 2.15  | 7  | 0.069             |
|   |       | RMLr        | 4.97  | 4.33 | [ -5.26, 15.20]  | 1.15  | 7  | 0.289             |

#### RANDOM EFFECTS:

| T | index | Parameter          | Coefficient |
|---|-------|--------------------|-------------|
| 0 | StO2% | SD (Intercept: ID) | 17.87       |
|   |       | SD (Residual)      | 7.17        |
|   | NIR   | SD (Intercept: ID) | 7.59        |
|   |       | SD (Residual)      | 12.03       |
|   | THI   | SD (Intercept: ID) | 9.44        |
|   |       | SD (Residual)      | 9.54        |
| 1 | DeHb  | SD (Intercept: ID) | 14.87       |
|   |       | SD (Residual)      | 8.6         |
|   | StO2% | SD (Intercept: ID) | 3.47        |
|   |       | SD (Residual)      | 4.29        |
|   | NIR   | SD (Intercept: ID) | 8.25        |
|   |       | SD (Residual)      | 13.13       |
|   | THI   | SD (Intercept: ID) | 11.57       |
|   |       | SD (Residual)      | 3.74        |
|   | DeHb  | SD (Intercept: ID) | 7.25        |
|   |       | SD (Residual)      | 4.86        |
|   | StO2% | SD (Intercept: ID) | 10.79       |
|   |       | SD (Residual)      | 8.91        |
| 2 | NIR   | SD (Intercept: ID) | 20.31       |
|   |       | SD (Residual)      | 14.55       |
|   | THI   | SD (Intercept: ID) | 8.58        |
|   |       | SD (Residual)      | 7.8         |
|   | DeHb  | SD (Intercept: ID) | 10.4        |
|   |       | SD (Residual)      | 4.23        |
| 3 | StO2% | SD (Intercept: ID) | 10.28       |
|   |       | SD (Residual)      | 9.34        |
|   | NIR   | SD (Intercept: ID) | 11.09       |
|   |       | SD (Residual)      | 13.99       |

4

|       |    |                 |       |
|-------|----|-----------------|-------|
| THI   | SD | (Intercept: ID) | 9.23  |
|       | SD | (Residual)      | 6.75  |
| DeHb  | SD | (Intercept: ID) | 10.94 |
|       | SD | (Residual)      | 7.21  |
| StO2% | SD | (Intercept: ID) | 11.83 |
|       | SD | (Residual)      | 7.76  |
| NIR   | SD | (Intercept: ID) | 7.59  |
|       | SD | (Residual)      | 4.46  |
| THI   | SD | (Intercept: ID) | 8.51  |
|       | SD | (Residual)      | 6.87  |
| DeHb  | SD | (Intercept: ID) | 11    |
|       | SD | (Residual)      | 6.12  |
